# Supplementary material for: Factors influencing natural regeneration of Fagus hayatae
Source: PeerJ. 2025 Jul 24;13:e19761. doi: 10.7717/peerj.19761 (PMC12296566; doi:10.7717/peerj.19761)
Supplement: Supplemental Information 1 [file peerj-13-19761-s001.xlsx]

## Sheet: Natural regeneration density (d
PLOT	seedlings density（SED）	saplings density（SAD）	small trees density（STD）
Low elevation	7	7	8
	3	2	0
	4	0	1
	10	7	3
	1	0	1
	29	0	0
	28	6	4
	15	1	6
	1	0	0
	31	2	1
	2	6	8
	0	3	6
	0	0	3
	0	0	0
	1	0	1
mid-elevation	5	0	0
	19	13	0
	24	1	0
	3	0	1
	38	2	0
	10	0	0
	26	0	1
	78	3	0
	57	0	0
	57	0	0
	41	22	5
	24	13	0
	16	1	3
	60	7	0
	22	0	0
high elevation	2	3	1
	1	0	0
	1	7	3
	1	12	6
	3	1	8
	35	0	0
	19	1	0
	0	0	0
	0	1	0
	0	1	0
	0	1	1
	0	2	0
	2	0	1
	3	0	0
	6	0	0

## Sheet: Natural regeneration height (d
PLOT	seedlings height（SEH）	saplings height（SAH）	small trees height（STH）
Low elevation	19.4	123	407.5
	7.3	118	0
	7	0	410
	31.3	132	286.7
	6	0	380
	13.6	0	0
	11.7	126.7	310
	21.3	100	311.7
	6	0	0
	20.8	150	250
	29	109	357.5
	0	196.7	311.7
	0	0	326.7
	0	0	0
	17	0	330
mid-elevation	17.2	0	0
	23.8	101.8	0
	18.7	78	0
	7	0	450
	16.1	115	0
	28.2	0	0
	13	0	320
	15.4	106.7	0
	9.1	0	0
	12	0	0
	23.3	108.1	289.2
	27.3	79.6	0
	14	72	408
	13	70	0
	16.2	0	0
high elevation	30	113.3	340
	24	0	0
	48	130	256.7
	26	120.3	296.7
	30.3	120	311.3
	8.1	0	0
	13.8	54	0
	0	0	0
	0	170	0
	0	75	0
	0	150	220
	0	92	0
	29.5	0	260
	15.7	0	0
	18	0	0

## Sheet: environment factors（Independent
PLOT	altitudes （A）	slope (S)	litter thickness (LT)	canopy density (CD)	shrub cover (SC)	herbaceous cover (HC)	number of adult trees (ANP)	diameter at breast height (DBH)	light intensity (LI)	soil temperature (ST)	soil moisture (SM)	air temperature (AT)	air humidity (AH)	PH	soil water content(SWC)	soil organic content(SOM)	total nitrogen(TN)	available phosphorus(AP)	available potassium(AK)	cation exchange capacity (CEC)	urease activity(UA)	catalase activity(CAT）
Low elevation	1673	45	5.62	67.8	35.8	11.4	17	11.6	8974.9	21.9	91	22.62	74	5.19	27.7383	111.298	2.87547	2.7	147	21.2242	105.222	47.1768
	1678	57	6.32	57.4	33.4	22.2	4	42.725	6865	22	90	22.84	84.2	5.07	30.3324	108.892	3.76776	8.23333	113	21.5494	220.547	38.2635
	1689	48	6	66	28.8	17.6	11	28.073	9195.2	23.4	90.6	23.7	81.3	4.98	34.1839	170.576	4.66212	5.5625	151	31.3334	54.3168	46.0383
	1677	43	4.9	54.4	31.2	26.4	4	44.15	17684.3	21.6	93.5	23.4	82	5.25	28.623	47.9024	1.80035	2	88	12.8219	189.978	51.9882
	1682	51	6.3	68.8	29.8	26.6	8	35.75	25373.3	22.4	90	23.6	78	5.33	36.9165	94.4262	3.44993	3.13333	186	20.3505	384.81	51.6945
	1683	50	4.42	66.8	10.7	20	8	34.675	11442.5	21.7	94	22.78	84.8	4.98	59.6615	144.298	3.23758	3.16667	135	24.4348	200.08	40.0125
	1691	41	5.42	66.4	28	6.4	8	22.913	11397	23.64	90.74	24.28	77.2	5.18	30.7925	137.476	3.02289	3.11667	119	26.924	57.072	45.9459
	1681	39	6	64	12.4	46	17	27.965	20521.2	22.6	91.1	23.775	74.25	5.26	32.1862	112.252	2.84317	2.08333	132	20.828	187.091	47.7939
	1671	33	6.22	64.8	16	32.2	10	33.1	11936.6	22.7	91.66	23.52	81	4.96	32.863	169.516	4.55367	4.9375	169	28.6004	217.792	36.96
	1665	46	4.96	70.8	14.6	28.2	8	27.063	9985.4	23.6	90.3	24.525	78	5.14	29.0872	123.948	2.94983	2.91667	120	22.7889	108.896	40.5636
	1683	40	5.72	72	30.4	28	13	8.223	8342.1	18.2	92	19.2	83	4.74	37.9479	114.427	3.2616	2.03333	153	24.9225	271.846	46.0482
	1685	39.6	6.5	66.4	39.6	6.8	16	17.85	6984.8	18.69	91.8	19.7	72	4.63	41.2009	207.171	5.23357	6.075	148	32.6949	225.139	51.8991
	1681	33	6.2	60.8	29.4	26.2	9	13.522	4861.9	18.75	91.95	19.15	72.5	5.29	29.791	76.7242	2.4034	1.93333	219	17.4955	324.326	49.9059
	1679	36	6.2	63	35.2	26.2	13	12.262	3402	18.7	91.2	19.6	72	5.11	37.4354	96.2053	3.00757	2.64167	147	20.7061	307.533	49.5264
	1678	30	7.64	73.4	23.8	22.8	12	12.017	5698.6	18.36	91.42	19.38	68.2	4.69	43.2082	129.679	3.29934	5.33333	178	24.5059	97.3504	42.1443
mid-elevation	1798	36	4.16	81.8	26.2	26	9	30.72	7787.2	23.76	80.38	23.56	71.8	5.22	49.3318	92.1768	2.85465	2.49167	118	19.1313	356.602	49.0446
	1780	55.2	2.9	85	21.6	48.4	6	23.217	6198	22.66	77.08	23.48	55.8	5.18	41.7506	61.4659	1.7098	1.78333	116	18.6436	204.016	40.9893
	1768	40	3	80	38.6	13	5	34	5461.9	24.9	78.6	25.42	54.4	5.21	41.2996	100.906	2.6313	2.74167	99	19.4869	145.107	43.0023
	1775	38	4.62	85	41.4	8.5	5	53.7	6257.1	22.98	85	24.64	56.6	5.17	38.326	107.509	3.07423	2.49167	88	21.1938	247.443	49.7112
	1771	64.2	4.8	84	38.8	16.6	12	30.442	5874.3	20.82	87	22.74	82.6	5.01	43.8155	115.629	3.30858	2.23333	134	22.6873	328.787	46.7148
	1779	57	4.16	68.2	34.2	13.4	9	22.733	5386	23.02	89.32	23.96	67.2	4.4	37.6546	192.365	3.79776	4.25	128	38.5267	57.8592	43.2234
	1783	52	2.52	70.4	12.8	27.2	6	25.733	4496.4	23.8	85.98	23.94	66.2	4.24	34.5925	147.254	3.3867	2.325	148	27.5539	200.736	42.4974
	1780	58	3	66.66	18.6	13.44	4	30.325	8418.5	23.48	83.78	24.24	67	4.36	37.8785	108.346	2.64519	2.25	109	26.3957	122.41	50.5527
	1782	56.2	2.58	69.4	17.2	9	6	31.067	7550	23.86	82.24	24.12	67	4.25	36.9122	160.315	3.54727	1.65833	123	27.2999	193.52	45.7281
	1781	63.2	3.94	62.4	21.4	17.2	11	24.5	9695.5	22.92	88.36	24.48	61.4	4.19	38.058	110.725	2.45155	1.59167	103	25.3086	74.784	43.3158
	1789	48	5.34	57.8	28	27.8	1	92	9742.4	22.6	79	23.45	75	4.55	42.9696	142.242	3.05986	1.18333	64	25.2273	91.5776	49.9224
	1782	68	3.68	65.6	16	21.6	7	33.172	9907.4	22.95	79	24.3	72.6	4.34	41.8236	148.592	3.09623	1.93333	89	28.3667	93.6768	40.0389
	1789	45	4.4	66	35.8	22	5	34.72	8890.6	22.43	78.93	21.38	84.4	4.22	40.5158	154.455	3.42349	1.625	98	29.403	217.661	33.9174
	1786	27	4.7	70	28.4	13.6	6	28.967	11172.6	23.8	83.03	23.6	71.67	4.29	41.6498	124.914	2.90112	1.35833	81	25.5626	96.3008	38.0358
	1777	48	5.4	75	41.4	8.6	8	36.725	10012.6	22.35	89.9	23.07	75	4.31	39.5397	170.532	3.5389	2.625	122	30.226	187.616	48.7608
high elevation	1930	51	6	66	38.8	19.6	9	15.733	17425.7	20.15	91.05	21.34	72	5.12	21.281	161.327	3.99292	6.84167	218	28.763	208.739	50.1204
	1935	72	4.06	67.8	19.6	13.2	8	11.613	15058.3	21.3	82.05	22.16	73.2	4.86	25.1057	140.632	3.69686	5.4875	142	38.8315	119.654	42.8604
	1937	57	5.86	64.6	23.6	11.2	20	9.525	9532.8	21.15	90.55	21.4	76	5.04	23.2449	60.8046	1.69737	3.04167	137	27.2186	94.8576	51.678
	1932	54	5.04	68.4	14.4	10.6	8	23.213	9351.5	20.2	91.4	20.95	73.5	5.02	34.1355	120.408	4.01968	2.55833	259	30.4495	289.69	48.4242
	1929	46	5.75	59.67	38.8	19.6	15	18.447	25441	21	91	21	76	5.15	22.0937	63.4066	1.74591	2.9	117	25.2273	128.051	53.2752
	1895	30	5.4	75	23.6	14.2	15	27.367	12269.2	16.9	98.4	15.7	99	5.16	21.5585	66.274	1.61972	2.18333	91	21.0414	40.016	47.1174
	1899	33	4.9	70.75	22.6	21.6	8	37.563	44813.3	16.6	98.6	15.6	99	5.13	27.2266	47.5845	1.21647	1.275	83	16.6421	67.1744	48.1503
	1913	54	5.2	73.8	15.4	36.2	5	40.68	7486.5	17	96	16	98	5.11	26.6363	57.5338	1.65467	2.95	119	21.1226	65.8624	50.4636
	1926	51	6.1	57.8	27.6	13.6	13	18.9	6786.5	17.2	95	16	97	5.09	23.8841	71.1745	1.7737	2.40833	146	25.9893	60.0896	49.2789
	1898	57	3.975	58.75	21	28	5	21.32	9047.8	17	96	16.2	97	4.98	18.0651	76.6167	2.1346	1.21667	174	28.8442	105.354	51.1764
	1934	39	6.2	56.8	36.8	24.8	8	16.238	21213.4	19.125	89.325	19.975	77.9	5.01	24.1493	62.0753	2.12709	3.575	153	22.9514	106.534	50.1006
	1931	43.75	4.75	62.5	15.6	13.8	5	18.04	20140.4	18.55	96.45	19.45	74.5	5.11	21.38	64.4019	2.41813	3.86667	164	25.7556	203.622	49.7211
	1918	57	4.2	73	11.6	9.8	9	22.311	12794.6	19.8	96.3	20.3	77	5.05	22.4123	81.7514	2.42148	2.425	133	29.1084	152.848	53.2785
	1913	45	3.25	76.8	13.4	15.4	4	16.875	10526.7	20.3	85.7	21.1	76	5.01	29.3954	81.1749	2.27012	1.625	119	24.4856	136.973	50.2029
	1912	42	4.75	69.75	13.6	32.4	6	48.65	11672.6	20.4	96.4	21.6	77	4.95	25.1523	52.3755	1.7425	1.95	84	17.8613	160.589	51.0807
